# Supplementary material for: Mitochondrial Targeting of Antioxidants Alters Pancreatic Acinar Cell Bioenergetics and Determines Cell Fate
Source: MDPI journal article supplement (doi:10.3390/ijms20071700), 2019-04-05
Supplement: s1 [file s1]

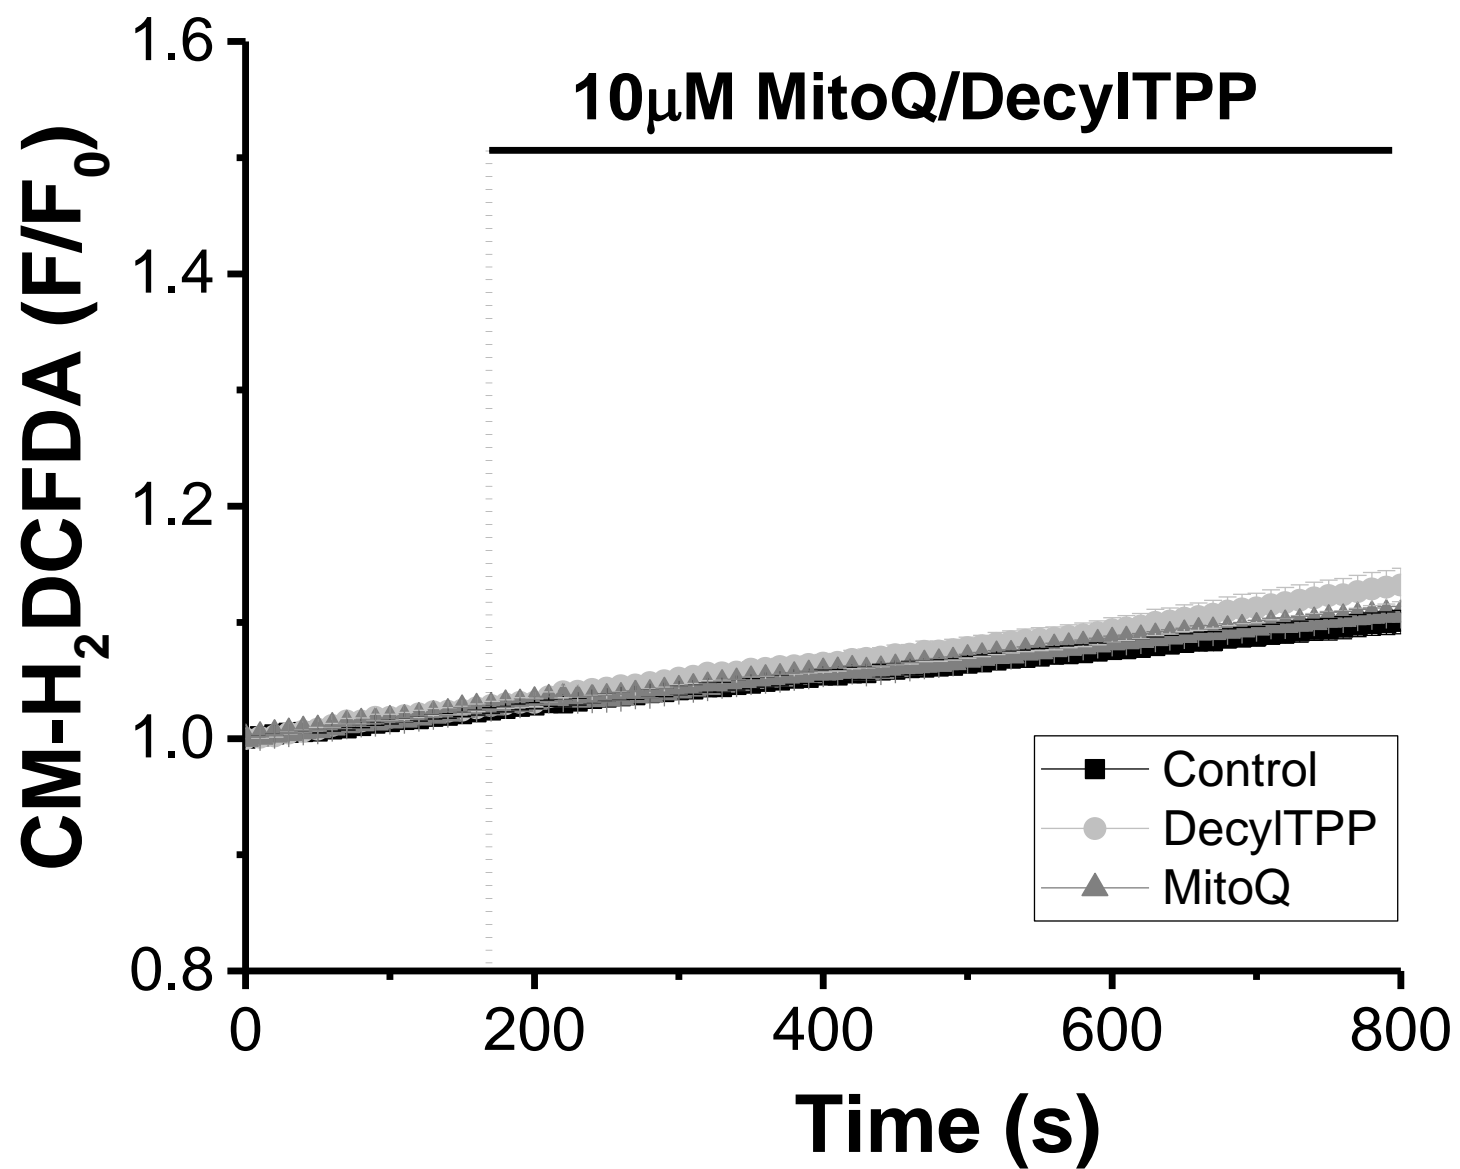

Supplementary Figure 1. Effects of MitoQ and DecylITPP on ROS in isolated pancreatic acinar cells measured using confocal microscopy. Neither 10  $\mu$ M MitoQ nor DecylITPP increased ROS production compared to control ( $n \geq 3$  mice per group). DCFDA fluorescence traces are shown as normalised ( $F/F_0$ ) mean  $\pm$  SEM.
